# Supplementary material
Source: publisher site journal article supplement (https://oneecosystem.pensoft.net/article/download/suppl/3653511/)
Supplement: Supplementary file 1

| Ecosystem subtype | Built-up type                    | code                                                                   | name                                                                           |
|-------------------|----------------------------------|------------------------------------------------------------------------|--------------------------------------------------------------------------------|
| J1                | 2 Compact midrise                | B                                                                      | Scattered trees                                                                |
|                   |                                  | BDE                                                                    | Scattered trees, low vegetation and bare rock or paved terrains                |
|                   |                                  | BE                                                                     | Scattered trees and bare rock or paved terrains                                |
|                   | 3 Compact low-rise               | BD                                                                     | Scattered trees and low vegetation                                             |
|                   |                                  | BDE                                                                    | Scattered trees, low vegetation and bare rock or paved terrains                |
|                   |                                  | BDEG                                                                   | Scattered trees, low vegetation, bare rock or paved terrains and water         |
|                   |                                  | CE                                                                     | Bushes/shrubs and bare rock or paved terrains                                  |
|                   | 4 Open high-rise                 | B                                                                      | Scattered trees                                                                |
|                   |                                  | BD                                                                     | Scattered trees and low vegetation                                             |
|                   |                                  | BDE                                                                    | Scattered trees, low vegetation and bare rock or paved terrains                |
|                   |                                  | CD                                                                     | Bushes/shrubs and low vegetation                                               |
|                   | 5 Open midrise                   | CDE                                                                    | Bushes/shrubs, low vegetation and bare rock or paved terrains                  |
|                   |                                  | B                                                                      | Scattered trees                                                                |
|                   |                                  | BC                                                                     | Scattered trees and bushes/shrubs                                              |
|                   |                                  | BCE                                                                    | Scattered trees, bushes/shrubs and bare rock or paved terrains                 |
|                   |                                  | BD                                                                     | Scattered trees and low vegetation                                             |
|                   |                                  | BDE                                                                    | Scattered trees, low vegetation and bare rock or paved terrains                |
|                   |                                  | BE                                                                     | Scattered trees and bare rock or paved terrains                                |
|                   | 6 Open low-rise                  | DE                                                                     | Low vegetation and bare rock or paved terrains                                 |
|                   |                                  | BD                                                                     | Scattered trees and low vegetation                                             |
|                   |                                  | BDE                                                                    | Scattered trees, low vegetation and bare rock or paved terrains                |
|                   |                                  | BDF                                                                    | Scattered trees, low vegetation and bare soil or sand                          |
|                   |                                  | BE                                                                     | Scattered trees and bare rock or paved terrains                                |
|                   |                                  | CD                                                                     | Bushes/shrubs and low vegetation                                               |
|                   |                                  | D                                                                      | Low vegetation                                                                 |
|                   | 7 Lightweight low-rise buildings | DE                                                                     | Low vegetation and bare rock or paved terrains                                 |
|                   |                                  | DE                                                                     | Low vegetation and bare rock or paved terrains                                 |
|                   | 8 Large low-rise                 | BDE                                                                    | Scattered trees, low vegetation and bare rock or paved terrains                |
|                   |                                  | BDEG                                                                   | Scattered trees, low vegetation, bare rock or paved terrains and water         |
|                   |                                  | BE                                                                     | Scattered trees and bare rock or paved terrains                                |
|                   |                                  | DE                                                                     | Low vegetation and bare rock or paved terrains                                 |
|                   | 9 Sparsely built                 | BCD                                                                    | Scattered trees, bushes/shrubs and low vegetation                              |
| BD                |                                  | Scattered trees and low vegetation                                     |                                                                                |
| BDE               |                                  | Scattered trees, low vegetation and bare rock or paved terrains        |                                                                                |
| 11 No buildings   | BD                               | Scattered trees and low vegetation                                     |                                                                                |
|                   | BDE                              | Scattered trees, low vegetation and bare rock or paved terrains        |                                                                                |
|                   | BDEG                             | Scattered trees, low vegetation, bare rock or paved terrains and water |                                                                                |
|                   | D                                | Low vegetation                                                         |                                                                                |
|                   | DE                               | Low vegetation and bare rock or paved terrains                         |                                                                                |
|                   | DEG                              | Low vegetation, bare rock or paved terrains and water                  |                                                                                |
|                   | G                                | Water                                                                  |                                                                                |
| J2                | 5 Open midrise                   | BDE                                                                    | Scattered trees, low vegetation and bare rock or paved terrains                |
|                   |                                  | DE                                                                     | Low vegetation and bare rock or paved terrains                                 |
|                   |                                  | E                                                                      | Bare rock or paved terrains                                                    |
|                   | 6 Open low-rise                  | ADE                                                                    | Dense trees, low vegetation and bare rock or paved terrains                    |
|                   |                                  | BCE                                                                    | Scattered trees, bushes/shrubs and bare rock or paved terrains                 |
|                   |                                  | BD                                                                     | Scattered trees and low vegetation                                             |
|                   |                                  | BDE                                                                    | Scattered trees, low vegetation and bare rock or paved terrains                |
|                   |                                  | BE                                                                     | Scattered trees and bare rock or paved terrains                                |
|                   |                                  | CDE                                                                    | Bushes/shrubs, low vegetation and bare rock or paved terrains                  |
|                   |                                  | CE                                                                     | Bushes/shrubs and bare rock or paved terrains                                  |
|                   |                                  | DE                                                                     | Low vegetation and bare rock or paved terrains                                 |
|                   | DF                               | Low vegetation and bare soil or sand                                   |                                                                                |
|                   | 8 Large low-rise                 | BDE                                                                    | Scattered trees, low vegetation and bare rock or paved terrains                |
| 9 Sparsely built  | BDE                              | Scattered trees, low vegetation and bare rock or paved terrains        |                                                                                |
|                   | DE                               | Low vegetation and bare rock or paved terrains                         |                                                                                |
| 11 No buildings   | BD                               | Scattered trees and low vegetation                                     |                                                                                |
|                   | 2 Compact midrise                | BDE                                                                    | Scattered trees, low vegetation and bare rock or paved terrains                |
|                   |                                  | BD                                                                     | Scattered trees and low vegetation                                             |
|                   | 3 Compact low-rise               | BDE                                                                    | Scattered trees, low vegetation and bare rock or paved terrains                |
|                   |                                  | BE                                                                     | Scattered trees and bare rock or paved terrains                                |
|                   |                                  | DE                                                                     | Low vegetation and bare rock or paved terrains                                 |
|                   |                                  | BCD                                                                    | Scattered trees, bushes/shrubs and low vegetation                              |
|                   | 4 Open high-rise                 | BDE                                                                    | Scattered trees, low vegetation and bare rock or paved terrains                |
|                   |                                  | BD                                                                     | Scattered trees and low vegetation                                             |
|                   | 5 Open midrise                   | BDE                                                                    | Scattered trees, low vegetation and bare rock or paved terrains                |
|                   |                                  | DE                                                                     | Low vegetation and bare rock or paved terrains                                 |
|                   |                                  | EBD                                                                    | Bare rock or paved terrains, scattered trees and low vegetation                |
|                   | 6 Open low-rise                  | A                                                                      | Dense trees                                                                    |
|                   |                                  | AD                                                                     | Dense trees and low vegetation                                                 |
|                   |                                  | ADE                                                                    | Dense trees, low vegetation and bare rock or paved terrains                    |
|                   |                                  | BCD                                                                    | Scattered trees, bushes/shrubs and low vegetation                              |
|                   |                                  | BCDE                                                                   | Scattered trees, bushes/shrubs, low vegetation and bare rock or paved terrains |
|                   |                                  | BCDG                                                                   | Scattered trees, bushes/shrubs, low vegetation and water                       |
|                   |                                  | BD                                                                     | Scattered trees and low vegetation                                             |
|                   |                                  | BDE                                                                    | Scattered trees, low vegetation and bare rock or paved terrains                |
|                   |                                  | BDEG                                                                   | Scattered trees, low vegetation, bare rock or paved terrains and water         |
| BDF               |                                  | Scattered trees, low vegetation and bare soil or sand                  |                                                                                |

|      |                                                                        |                                                |                                                                 |                                                                                    |                                                                                    |
|------|------------------------------------------------------------------------|------------------------------------------------|-----------------------------------------------------------------|------------------------------------------------------------------------------------|------------------------------------------------------------------------------------|
| J3   |                                                                        | CD                                             | Bushes/shrubs and low vegetation                                |                                                                                    |                                                                                    |
|      |                                                                        | D                                              | Low vegetation                                                  |                                                                                    |                                                                                    |
|      |                                                                        | DE                                             | Low vegetation and bare rock or paved terrains                  |                                                                                    |                                                                                    |
|      |                                                                        | EBD                                            | Bare rock or paved terrains, scattered trees and low vegetation |                                                                                    |                                                                                    |
|      | 7                                                                      | Lightweight low- rise                          | BCD                                                             | Scattered trees, bushes/shrubs and low vegetation                                  |                                                                                    |
|      |                                                                        |                                                | BD                                                              | Scattered trees and low vegetation                                                 |                                                                                    |
|      | 8                                                                      | Large low-rise                                 | BCD                                                             | Scattered trees, bushes/shrubs and low vegetation                                  |                                                                                    |
|      |                                                                        |                                                | BD                                                              | Scattered trees and low vegetation                                                 |                                                                                    |
|      |                                                                        |                                                | BDE                                                             | Scattered trees, low vegetation and bare rock or paved terrains                    |                                                                                    |
|      |                                                                        |                                                | BDEG                                                            | Scattered trees, low vegetation, bare rock or paved terrains and water             |                                                                                    |
|      | 9                                                                      | Sparsely built                                 | DE                                                              | Low vegetation and bare rock or paved terrains                                     |                                                                                    |
|      |                                                                        |                                                | A                                                               | Dense trees                                                                        |                                                                                    |
|      |                                                                        |                                                | AB                                                              | Dense and scattered trees                                                          |                                                                                    |
|      |                                                                        |                                                | ACD                                                             | Dense trees, bushes/shrubs and low vegetation                                      |                                                                                    |
|      |                                                                        |                                                | AD                                                              | Dense trees and low vegetation                                                     |                                                                                    |
|      |                                                                        |                                                | ADE                                                             | Dense trees, low vegetation and bare rock or paved terrains                        |                                                                                    |
|      |                                                                        |                                                | AE                                                              | Dense trees and bare rock or paved terrains                                        |                                                                                    |
|      |                                                                        |                                                | BC                                                              | Scattered trees and bushes/shrubs                                                  |                                                                                    |
|      |                                                                        |                                                | BCD                                                             | Scattered trees, bushes/shrubs and low vegetation                                  |                                                                                    |
|      |                                                                        |                                                | BCDG                                                            | Scattered trees, bushes/shrubs, low vegetation and water                           |                                                                                    |
|      |                                                                        |                                                | BD                                                              | Scattered trees and low vegetation                                                 |                                                                                    |
|      |                                                                        |                                                | BDE                                                             | Scattered trees, low vegetation and bare rock or paved terrains                    |                                                                                    |
|      |                                                                        |                                                | BDEG                                                            | Scattered trees, low vegetation, bare rock or paved terrains and water             |                                                                                    |
|      |                                                                        |                                                | BDF                                                             | Scattered trees, low vegetation and bare soil or sand                              |                                                                                    |
|      |                                                                        |                                                | CD                                                              | Bushes/shrubs and low vegetation                                                   |                                                                                    |
|      |                                                                        |                                                | CDE                                                             | Bushes/shrubs, low vegetation and bare rock or paved terrains                      |                                                                                    |
|      |                                                                        |                                                | D                                                               | Low vegetation                                                                     |                                                                                    |
|      |                                                                        |                                                | DC                                                              | Bushes/shrubs and low vegetation                                                   |                                                                                    |
|      | DE                                                                     | Low vegetation and bare rock or paved terrains |                                                                 |                                                                                    |                                                                                    |
|      | 11                                                                     | No buildings                                   | ACD                                                             | Dense trees, bushes/shrubs and low vegetation                                      |                                                                                    |
|      |                                                                        |                                                | AD                                                              | Dense trees and low vegetation                                                     |                                                                                    |
|      |                                                                        |                                                | BCD                                                             | Scattered trees, bushes/shrubs and low vegetation                                  |                                                                                    |
|      |                                                                        |                                                | BD                                                              | Scattered trees and low vegetation                                                 |                                                                                    |
|      |                                                                        |                                                | BDE                                                             | Scattered trees, low vegetation and bare rock or paved terrains                    |                                                                                    |
|      |                                                                        |                                                | BDF                                                             | Scattered trees, low vegetation and bare soil or sand                              |                                                                                    |
|      |                                                                        |                                                | D                                                               | Low vegetation                                                                     |                                                                                    |
|      |                                                                        |                                                | DE                                                              | Low vegetation and bare rock or paved terrains                                     |                                                                                    |
|      |                                                                        |                                                | DG                                                              | Low vegetation and water                                                           |                                                                                    |
|      |                                                                        |                                                | E                                                               | Bare rock or paved terrains                                                        |                                                                                    |
|      | J4                                                                     | 5                                              | Open midrise                                                    | BCD                                                                                | Scattered trees, bushes/shrubs and low vegetation                                  |
|      |                                                                        |                                                |                                                                 | BDE                                                                                | Scattered trees, low vegetation and bare rock or paved terrains                    |
|      |                                                                        |                                                |                                                                 | BDEF                                                                               | Scattered trees, low vegetation, bare rock or paved terrains and bare soil or sand |
| D    |                                                                        |                                                |                                                                 | Low vegetation                                                                     |                                                                                    |
| DE   |                                                                        |                                                |                                                                 | Low vegetation and bare rock or paved terrains                                     |                                                                                    |
| DEF  |                                                                        |                                                |                                                                 | Low vegetation, bare rock or paved terrains and bare soil or sand                  |                                                                                    |
| 6    |                                                                        | Open low-rise                                  | E                                                               | Bare rock or paved terrains                                                        |                                                                                    |
|      |                                                                        |                                                | A                                                               | Dense trees                                                                        |                                                                                    |
|      |                                                                        |                                                | AE                                                              | Dense trees and bare rock or paved terrains                                        |                                                                                    |
|      |                                                                        |                                                | BDE                                                             | Scattered trees, low vegetation and bare rock or paved terrains                    |                                                                                    |
| 9    |                                                                        | Sparsely built                                 | BDEF                                                            | Scattered trees, low vegetation, bare rock or paved terrains and bare soil or sand |                                                                                    |
|      |                                                                        |                                                | DE                                                              | Low vegetation and bare rock or paved terrains                                     |                                                                                    |
|      |                                                                        |                                                | A                                                               | Dense trees                                                                        |                                                                                    |
|      |                                                                        |                                                | AB                                                              | Dense and scattered trees                                                          |                                                                                    |
|      |                                                                        |                                                | AD                                                              | Dense trees and low vegetation                                                     |                                                                                    |
|      |                                                                        |                                                | ADE                                                             | Dense trees, low vegetation and bare rock or paved terrains                        |                                                                                    |
|      |                                                                        |                                                | AE                                                              | Dense trees and bare rock or paved terrains                                        |                                                                                    |
|      | BDE                                                                    |                                                | Scattered trees, low vegetation and bare rock or paved terrains |                                                                                    |                                                                                    |
| BDEG | Scattered trees, low vegetation, bare rock or paved terrains and water |                                                |                                                                 |                                                                                    |                                                                                    |
| 11   | No buildings                                                           | DE                                             | Low vegetation and bare rock or paved terrains                  |                                                                                    |                                                                                    |
|      |                                                                        | F                                              | Bare soil or sand                                               |                                                                                    |                                                                                    |
|      | 5                                                                      | Open midrise                                   | F                                                               | Bare soil or sand                                                                  |                                                                                    |
|      |                                                                        |                                                | BDE                                                             | Scattered trees, low vegetation and bare rock or paved terrains                    |                                                                                    |
|      | 6                                                                      | Open low-rise                                  | BCD                                                             | Scattered trees, bushes/shrubs and low vegetation                                  |                                                                                    |
|      |                                                                        |                                                | BD                                                              | Scattered trees and low vegetation                                                 |                                                                                    |
|      |                                                                        |                                                | BDE                                                             | Scattered trees, low vegetation and bare rock or paved terrains                    |                                                                                    |
|      | 9                                                                      | Sparsely built                                 | EBD                                                             | Bare rock or paved terrains, scattered trees and low vegetation                    |                                                                                    |
|      |                                                                        |                                                | A                                                               | Dense trees                                                                        |                                                                                    |
|      |                                                                        |                                                | AD                                                              | Dense trees and low vegetation                                                     |                                                                                    |
|      |                                                                        |                                                | ADE                                                             | Dense trees, low vegetation and bare rock or paved terrains                        |                                                                                    |
|      |                                                                        |                                                | BCD                                                             | Scattered trees, bushes/shrubs and low vegetation                                  |                                                                                    |
|      |                                                                        |                                                | BD                                                              | Scattered trees and low vegetation                                                 |                                                                                    |
|      |                                                                        |                                                | BDE                                                             | Scattered trees, low vegetation and bare rock or paved terrains                    |                                                                                    |
|      |                                                                        |                                                | BDEG                                                            | Scattered trees, low vegetation, bare rock or paved terrains and water             |                                                                                    |
| BDF  |                                                                        |                                                | Scattered trees, low vegetation and bare soil or sand           |                                                                                    |                                                                                    |
| CD   |                                                                        |                                                | Bushes/shrubs and low vegetation                                |                                                                                    |                                                                                    |
| CDE  | Bushes/shrubs, low vegetation and bare rock or paved terrains          |                                                |                                                                 |                                                                                    |                                                                                    |
| D    | Low vegetation                                                         |                                                |                                                                 |                                                                                    |                                                                                    |
| DE   | Low vegetation and bare rock or paved terrains                         |                                                |                                                                 |                                                                                    |                                                                                    |
| DEF  | Low vegetation, bare rock or paved terrains and bare soil or sand      |                                                |                                                                 |                                                                                    |                                                                                    |
| EBD  | Bare rock or paved terrains, scattered trees and low vegetation        |                                                |                                                                 |                                                                                    |                                                                                    |
| A    | Dense trees                                                            |                                                |                                                                 |                                                                                    |                                                                                    |

J5

|      |                                                                                    |      |                                                                                  |     |                                                                 |
|------|------------------------------------------------------------------------------------|------|----------------------------------------------------------------------------------|-----|-----------------------------------------------------------------|
| 11   | No buildings                                                                       | ABD  | Dense trees, scattered trees and low vegetation                                  |     |                                                                 |
|      |                                                                                    | AC   | Dense trees and bushes/shrubs                                                    |     |                                                                 |
|      |                                                                                    | ACD  | Dense trees, bushes/shrubs and low vegetation                                    |     |                                                                 |
|      |                                                                                    | ACE  | Dense trees, bushes/shrubs and bare rock or paved terrains                       |     |                                                                 |
|      |                                                                                    | AD   | Dense trees and low vegetation                                                   |     |                                                                 |
|      |                                                                                    | ADE  | Dense trees, low vegetation and bare rock or paved terrains                      |     |                                                                 |
|      |                                                                                    | AE   | Dense trees and bare rock or paved terrains                                      |     |                                                                 |
|      |                                                                                    | AFG  | Dense trees, bare soil or sand and water                                         |     |                                                                 |
|      |                                                                                    | B    | Scattered trees                                                                  |     |                                                                 |
|      |                                                                                    | BC   | Scattered trees and bushes/shrubs                                                |     |                                                                 |
|      |                                                                                    | BCD  | Scattered trees, bushes/shrubs and low vegetation                                |     |                                                                 |
|      |                                                                                    | BCDE | Scattered trees, bushes/shrubs, low vegetation and bare rock or paved terrains   |     |                                                                 |
|      |                                                                                    | BCDG | Scattered trees, bushes/shrubs, low vegetation and water                         |     |                                                                 |
|      |                                                                                    | BCE  | Scattered trees, bushes/shrubs and bare rock or paved terrains                   |     |                                                                 |
|      |                                                                                    | BCF  | Scattered trees, bushes/shrubs and bare soil or sand                             |     |                                                                 |
|      |                                                                                    | BD   | Scattered trees and low vegetation                                               |     |                                                                 |
|      |                                                                                    | BDE  | Scattered trees, low vegetation and bare rock or paved terrains                  |     |                                                                 |
|      |                                                                                    | BDEG | Scattered trees, low vegetation, bare rock or paved terrains and water           |     |                                                                 |
|      |                                                                                    | BDF  | Scattered trees, low vegetation and bare soil or sand                            |     |                                                                 |
|      |                                                                                    | BDG  | Scattered trees, low vegetation and water                                        |     |                                                                 |
|      |                                                                                    | BE   | Scattered trees and bare rock or paved terrains                                  |     |                                                                 |
|      |                                                                                    | BFG  | Scattered trees, bare soil or sand and water                                     |     |                                                                 |
|      |                                                                                    | C    | Bushes/shrubs                                                                    |     |                                                                 |
|      |                                                                                    | CD   | Bushes/shrubs and low vegetation                                                 |     |                                                                 |
|      |                                                                                    | CDE  | Bushes/shrubs, low vegetation and bare rock or paved terrains                    |     |                                                                 |
|      |                                                                                    | CDEF | Bushes/shrubs, low vegetation, bare rock or paved terrains and bare soil or sand |     |                                                                 |
|      |                                                                                    | CG   | Bushes/shrubs, bare rock or paved terrains and water                             |     |                                                                 |
|      |                                                                                    | D    | Low vegetation                                                                   |     |                                                                 |
|      |                                                                                    | DE   | Low vegetation and bare rock or paved terrains                                   |     |                                                                 |
|      |                                                                                    | DEF  | Low vegetation, bare rock or paved terrains and bare soil or sand                |     |                                                                 |
|      |                                                                                    | DEG  | Low vegetation, bare rock or paved terrains and water                            |     |                                                                 |
|      |                                                                                    | DF   | Low vegetation and bare soil or sand                                             |     |                                                                 |
|      |                                                                                    | DFG  | Low vegetation and bare soil or sand and water                                   |     |                                                                 |
|      |                                                                                    | E    | Bare rock or paved terrains                                                      |     |                                                                 |
|      |                                                                                    | EBD  | Bare rock or paved terrains, scattered trees and low vegetation                  |     |                                                                 |
|      |                                                                                    | ED   | Low vegetation and bare rock or paved terrains                                   |     |                                                                 |
|      |                                                                                    | F    | Bare soil or sand                                                                |     |                                                                 |
|      |                                                                                    | 4    | Open high-rise                                                                   | BDE | Scattered trees, low vegetation and bare rock or paved terrains |
|      |                                                                                    | 5    | Open midrise                                                                     | BDE | Scattered trees, low vegetation and bare rock or paved terrains |
|      |                                                                                    | 6    | Open low-rise                                                                    | BCD | Scattered trees, bushes/shrubs and low vegetation               |
|      |                                                                                    |      |                                                                                  | BD  | Scattered trees and low vegetation                              |
|      |                                                                                    |      |                                                                                  | BDE | Scattered trees, low vegetation and bare rock or paved terrains |
|      |                                                                                    | 8    | Large low-rise                                                                   | DE  | Low vegetation and bare rock or paved terrains                  |
|      |                                                                                    |      |                                                                                  | ABE | Dense trees, scattered trees and bare rock or paved terrains    |
|      |                                                                                    |      |                                                                                  | ACD | Dense trees, bushes/shrubs and low vegetation                   |
|      |                                                                                    |      |                                                                                  | ACE | Dense trees, bushes/shrubs and bare rock or paved terrains      |
| AD   | Dense trees and low vegetation                                                     |      |                                                                                  |     |                                                                 |
| ADE  | Dense trees, low vegetation and bare rock or paved terrains                        |      |                                                                                  |     |                                                                 |
| AE   | Dense trees and bare rock or paved terrains                                        |      |                                                                                  |     |                                                                 |
| B    | Scattered trees                                                                    |      |                                                                                  |     |                                                                 |
| BC   | Scattered trees and bushes/shrubs                                                  |      |                                                                                  |     |                                                                 |
| BCD  | Scattered trees, bushes/shrubs and low vegetation                                  |      |                                                                                  |     |                                                                 |
| BCE  | Scattered trees, bushes/shrubs and bare rock or paved terrains                     |      |                                                                                  |     |                                                                 |
| BCF  | Scattered trees, bushes/shrubs and bare soil or sand                               |      |                                                                                  |     |                                                                 |
| BD   | Scattered trees and low vegetation                                                 |      |                                                                                  |     |                                                                 |
| BDE  | Scattered trees, low vegetation and bare rock or paved terrains                    |      |                                                                                  |     |                                                                 |
| BDEF | Scattered trees, low vegetation, bare rock or paved terrains and bare soil or sand |      |                                                                                  |     |                                                                 |
| BDEG | Scattered trees, low vegetation, bare rock or paved terrains and water             |      |                                                                                  |     |                                                                 |
| BDF  | Scattered trees, low vegetation and bare soil or sand                              |      |                                                                                  |     |                                                                 |
| BE   | Scattered trees and bare rock or paved terrains                                    |      |                                                                                  |     |                                                                 |
| BEF  | Scattered trees, bare rock or paved terrains and bare soil or sand                 |      |                                                                                  |     |                                                                 |
| BFG  | Scattered trees, bare soil or sand and water                                       |      |                                                                                  |     |                                                                 |
| C    | Bushes/shrubs                                                                      |      |                                                                                  |     |                                                                 |
| CD   | Bushes/shrubs and low vegetation                                                   |      |                                                                                  |     |                                                                 |
| CDE  | Bushes/shrubs, low vegetation and bare rock or paved terrains                      |      |                                                                                  |     |                                                                 |
| CDF  | Bushes/shrubs, low vegetation and bare soil or sand                                |      |                                                                                  |     |                                                                 |
| CE   | Bushes/shrubs and bare rock or paved terrains                                      |      |                                                                                  |     |                                                                 |
| D    | Low vegetation                                                                     |      |                                                                                  |     |                                                                 |
| DE   | Low vegetation and bare rock or paved terrains                                     |      |                                                                                  |     |                                                                 |
| DEF  | Low vegetation, bare rock or paved terrains and bare soil or sand                  |      |                                                                                  |     |                                                                 |
| DEG  | Low vegetation, bare rock or paved terrains and water                              |      |                                                                                  |     |                                                                 |
| DF   | Low vegetation and bare soil or sand                                               |      |                                                                                  |     |                                                                 |
| E    | Bare rock or paved terrains                                                        |      |                                                                                  |     |                                                                 |
| EBD  | Bare rock or paved terrains, scattered trees and low vegetation                    |      |                                                                                  |     |                                                                 |
| ED   | Low vegetation and bare rock or paved terrains                                     |      |                                                                                  |     |                                                                 |
| EF   | Bare rock or paved terrains and bare soil or sand                                  |      |                                                                                  |     |                                                                 |
| F    | Bare soil or sand                                                                  |      |                                                                                  |     |                                                                 |
|      |                                                                                    | A    | Dense trees                                                                      |     |                                                                 |
|      |                                                                                    | AD   | Dense trees and low vegetation                                                   |     |                                                                 |
|      |                                                                                    | AE   | Dense trees and bare rock or paved terrains                                      |     |                                                                 |
|      |                                                                                    | BCD  | Scattered trees, bushes/shrubs and low vegetation                                |     |                                                                 |

|      |                                                                          |                                                                                    |                                                                                           |                                                                                |     |                                                                 |
|------|--------------------------------------------------------------------------|------------------------------------------------------------------------------------|-------------------------------------------------------------------------------------------|--------------------------------------------------------------------------------|-----|-----------------------------------------------------------------|
| J6   | 9                                                                        | Sparsely built                                                                     | BCDE                                                                                      | Scattered trees, bushes/shrubs, low vegetation and bare rock or paved terrains |     |                                                                 |
|      |                                                                          |                                                                                    | BD                                                                                        | Scattered trees and low vegetation                                             |     |                                                                 |
|      |                                                                          |                                                                                    | BDE                                                                                       | Scattered trees, low vegetation and bare rock or paved terrains                |     |                                                                 |
|      |                                                                          |                                                                                    | BDEG                                                                                      | Scattered trees, low vegetation, bare rock or paved terrains and water         |     |                                                                 |
|      |                                                                          |                                                                                    | BDF                                                                                       | Scattered trees, low vegetation and bare soil or sand                          |     |                                                                 |
|      |                                                                          |                                                                                    | CD                                                                                        | Bushes/shrubs and low vegetation                                               |     |                                                                 |
|      |                                                                          |                                                                                    | CDE                                                                                       | Bushes/shrubs, low vegetation and bare rock or paved terrains                  |     |                                                                 |
|      |                                                                          |                                                                                    | D                                                                                         | Low vegetation                                                                 |     |                                                                 |
|      |                                                                          |                                                                                    | DE                                                                                        | Low vegetation and bare rock or paved terrains                                 |     |                                                                 |
|      |                                                                          |                                                                                    | DEF                                                                                       | Low vegetation, bare rock or paved terrains and bare soil or sand              |     |                                                                 |
|      |                                                                          |                                                                                    | DEG                                                                                       | Low vegetation, bare rock or paved terrains and water                          |     |                                                                 |
|      |                                                                          |                                                                                    | DF                                                                                        | Low vegetation and bare soil or sand                                           |     |                                                                 |
|      |                                                                          |                                                                                    | E                                                                                         | Bare rock or paved terrains                                                    |     |                                                                 |
|      |                                                                          |                                                                                    | 10                                                                                        | Heavy industry                                                                 | BCE | Scattered trees, bushes/shrubs and bare rock or paved terrains  |
|      |                                                                          |                                                                                    |                                                                                           |                                                                                | BDE | Scattered trees, low vegetation and bare rock or paved terrains |
|      | BDEF                                                                     | Scattered trees, low vegetation, bare rock or paved terrains and bare soil or sand |                                                                                           |                                                                                |     |                                                                 |
|      | BDEG                                                                     | Scattered trees, low vegetation, bare rock or paved terrains and water             |                                                                                           |                                                                                |     |                                                                 |
|      | BDF                                                                      | Scattered trees, low vegetation and bare soil or sand                              |                                                                                           |                                                                                |     |                                                                 |
|      | BE                                                                       | Scattered trees and bare rock or paved terrains                                    |                                                                                           |                                                                                |     |                                                                 |
|      | CDE                                                                      | Bushes/shrubs, low vegetation and bare rock or paved terrains                      |                                                                                           |                                                                                |     |                                                                 |
|      | CE                                                                       | Bushes/shrubs and bare rock or paved terrains                                      |                                                                                           |                                                                                |     |                                                                 |
|      | CED                                                                      | Bushes/shrubs, bare rock or paved terrains and low vegetation                      |                                                                                           |                                                                                |     |                                                                 |
|      | DE                                                                       | Low vegetation and bare rock or paved terrains                                     |                                                                                           |                                                                                |     |                                                                 |
|      | DEF                                                                      | Low vegetation, bare rock or paved terrains and bare soil or sand                  |                                                                                           |                                                                                |     |                                                                 |
|      | DEG                                                                      | Low vegetation, bare rock or paved terrains and water                              |                                                                                           |                                                                                |     |                                                                 |
|      | E                                                                        | Bare rock or paved terrains                                                        |                                                                                           |                                                                                |     |                                                                 |
|      | EBD                                                                      | Bare rock or paved terrains, scattered trees and low vegetation                    |                                                                                           |                                                                                |     |                                                                 |
|      | 11                                                                       | No buildings                                                                       |                                                                                           |                                                                                | A   | Dense trees                                                     |
|      |                                                                          |                                                                                    | AD                                                                                        | Dense trees and low vegetation                                                 |     |                                                                 |
|      |                                                                          |                                                                                    | BC                                                                                        | Scattered trees and bushes/shrubs                                              |     |                                                                 |
|      |                                                                          |                                                                                    | BCD                                                                                       | Scattered trees, bushes/shrubs and low vegetation                              |     |                                                                 |
|      |                                                                          |                                                                                    | BCE                                                                                       | Scattered trees, bushes/shrubs and bare rock or paved terrains                 |     |                                                                 |
|      |                                                                          |                                                                                    | BD                                                                                        | Scattered trees and low vegetation                                             |     |                                                                 |
| BDE  |                                                                          |                                                                                    | Scattered trees, low vegetation and bare rock or paved terrains                           |                                                                                |     |                                                                 |
| BDEF |                                                                          |                                                                                    | Scattered trees, low vegetation, bare rock or paved terrains and bare soil or sand        |                                                                                |     |                                                                 |
| BDEG |                                                                          |                                                                                    | Scattered trees, low vegetation, bare rock or paved terrains and water                    |                                                                                |     |                                                                 |
| CD   |                                                                          |                                                                                    | Bushes/shrubs and low vegetation                                                          |                                                                                |     |                                                                 |
| CDE  |                                                                          |                                                                                    | Bushes/shrubs, low vegetation and bare rock or paved terrains                             |                                                                                |     |                                                                 |
| D    |                                                                          |                                                                                    | Low vegetation                                                                            |                                                                                |     |                                                                 |
| DE   |                                                                          |                                                                                    | Low vegetation and bare rock or paved terrains                                            |                                                                                |     |                                                                 |
| DEF  |                                                                          |                                                                                    | Low vegetation, bare rock or paved terrains and bare soil or sand                         |                                                                                |     |                                                                 |
| DEG  |                                                                          |                                                                                    | Low vegetation, bare rock or paved terrains and water                                     |                                                                                |     |                                                                 |
| E    |                                                                          |                                                                                    | Bare rock or paved terrains                                                               |                                                                                |     |                                                                 |
| ED   |                                                                          |                                                                                    | Low vegetation and bare rock or paved terrains                                            |                                                                                |     |                                                                 |
| F    |                                                                          |                                                                                    | Bare soil or sand                                                                         |                                                                                |     |                                                                 |
| J7   | 8                                                                        | Large low-rise                                                                     | BDE                                                                                       | Scattered trees, low vegetation and bare rock or paved terrains                |     |                                                                 |
|      |                                                                          |                                                                                    | DE                                                                                        | Low vegetation and bare rock or paved terrains                                 |     |                                                                 |
|      |                                                                          |                                                                                    | E                                                                                         | Bare rock or paved terrains                                                    |     |                                                                 |
|      | 9                                                                        | Sparsely built                                                                     | BDE                                                                                       | Scattered trees, low vegetation and bare rock or paved terrains                |     |                                                                 |
|      |                                                                          |                                                                                    | DE                                                                                        | Low vegetation and bare rock or paved terrains                                 |     |                                                                 |
|      |                                                                          |                                                                                    | E                                                                                         | Bare rock or paved terrains                                                    |     |                                                                 |
|      | 11                                                                       | No buildings                                                                       | BDE                                                                                       | Scattered trees, low vegetation and bare rock or paved terrains                |     |                                                                 |
|      |                                                                          |                                                                                    | BDEG                                                                                      | Scattered trees, low vegetation, bare rock or paved terrains and water         |     |                                                                 |
|      |                                                                          |                                                                                    | BE                                                                                        | Scattered trees and bare rock or paved terrains                                |     |                                                                 |
| J8   | 8                                                                        | Large low-rise                                                                     | D                                                                                         | Low vegetation                                                                 |     |                                                                 |
|      |                                                                          |                                                                                    | DE                                                                                        | Low vegetation and bare rock or paved terrains                                 |     |                                                                 |
|      |                                                                          |                                                                                    | DEF                                                                                       | Low vegetation, bare rock or paved terrains and bare soil or sand              |     |                                                                 |
|      | 9                                                                        | Sparsely built                                                                     | DEG                                                                                       | Low vegetation, bare rock or paved terrains and water                          |     |                                                                 |
|      |                                                                          |                                                                                    | E                                                                                         | Bare rock or paved terrains                                                    |     |                                                                 |
|      |                                                                          |                                                                                    | E                                                                                         | Bare rock or paved terrains                                                    |     |                                                                 |
| 11   | No buildings                                                             | BDE                                                                                | Scattered trees, low vegetation and bare rock or paved terrains                           |                                                                                |     |                                                                 |
|      |                                                                          | BDEFG                                                                              | Scattered trees, low vegetation, bare rock or paved terrains, bare soil or sand and water |                                                                                |     |                                                                 |
|      |                                                                          | CF                                                                                 | Bushes/shrubs and bare soil or sand                                                       |                                                                                |     |                                                                 |
|      |                                                                          | DEF                                                                                | Low vegetation, bare rock or paved terrains and bare soil or sand                         |                                                                                |     |                                                                 |
|      |                                                                          | BDE                                                                                | Scattered trees, low vegetation and bare rock or paved terrains                           |                                                                                |     |                                                                 |
|      |                                                                          | BDF                                                                                | Scattered trees, low vegetation and bare soil or sand                                     |                                                                                |     |                                                                 |
|      |                                                                          | DE                                                                                 | Low vegetation and bare rock or paved terrains                                            |                                                                                |     |                                                                 |
|      |                                                                          | DEF                                                                                | Low vegetation, bare rock or paved terrains and bare soil or sand                         |                                                                                |     |                                                                 |
|      |                                                                          | DF                                                                                 | Low vegetation and bare soil or sand                                                      |                                                                                |     |                                                                 |
|      |                                                                          | AEF                                                                                | Dense trees, bare rock or paved terrains and bare soil or sand                            |                                                                                |     |                                                                 |
|      |                                                                          | BDE                                                                                | Scattered trees, low vegetation and bare rock or paved terrains                           |                                                                                |     |                                                                 |
|      |                                                                          | BDEG                                                                               | Scattered trees, low vegetation, bare rock or paved terrains and water                    |                                                                                |     |                                                                 |
| BDF  | Scattered trees, low vegetation and bare soil or sand                    |                                                                                    |                                                                                           |                                                                                |     |                                                                 |
| CF   | Bushes/shrubs and bare soil or sand                                      |                                                                                    |                                                                                           |                                                                                |     |                                                                 |
| DE   | Low vegetation and bare rock or paved terrains                           |                                                                                    |                                                                                           |                                                                                |     |                                                                 |
| DEF  | Low vegetation, bare rock or paved terrains and bare soil or sand        |                                                                                    |                                                                                           |                                                                                |     |                                                                 |
| DEFG | Low vegetation, bare rock or paved terrains, bare soil or sand and water |                                                                                    |                                                                                           |                                                                                |     |                                                                 |
| DEG  | Low vegetation, bare rock or paved terrains and water                    |                                                                                    |                                                                                           |                                                                                |     |                                                                 |
| DF   | Low vegetation and bare soil or sand                                     |                                                                                    |                                                                                           |                                                                                |     |                                                                 |
| DFG  | Low vegetation and bare soil or sand and water                           |                                                                                    |                                                                                           |                                                                                |     |                                                                 |
| E    | Bare rock or paved terrains                                              |                                                                                    |                                                                                           |                                                                                |     |                                                                 |
| EF   | Bare rock or paved terrains and bare soil or sand                        |                                                                                    |                                                                                           |                                                                                |     |                                                                 |
| EG   | Bare rock or paved terrains and water                                    |                                                                                    |                                                                                           |                                                                                |     |                                                                 |

|            |   |                |                                                                             |                                                                               |
|------------|---|----------------|-----------------------------------------------------------------------------|-------------------------------------------------------------------------------|
|            |   | F              | Bare soil or sand                                                           |                                                                               |
|            |   | FG             | Bare soil or sand and water                                                 |                                                                               |
| <b>J9</b>  | 9 | Sparsely built | BDE Scattered trees, low vegetation and bare rock or paved terrains         |                                                                               |
|            |   |                | BDF Scattered trees, low vegetation and bare soil or sand                   |                                                                               |
|            |   |                | DE Low vegetation and bare rock or paved terrains                           |                                                                               |
|            |   |                | DEF Low vegetation, bare rock or paved terrains and bare soil or sand       |                                                                               |
|            |   |                | DF Low vegetation and bare soil or sand                                     |                                                                               |
|            |   |                | DFG Low vegetation and bare soil or sand and water                          |                                                                               |
|            |   | 11             | No buildings                                                                | ACD Dense trees, bushes/shrubs and low vegetation                             |
|            |   |                |                                                                             | BCF Scattered trees, bushes/shrubs and bare soil or sand                      |
|            |   |                |                                                                             | BCG Scattered trees, bushes/shrubs and water                                  |
|            |   |                |                                                                             | BD Scattered trees and low vegetation                                         |
|            |   |                |                                                                             | BDE Scattered trees, low vegetation and bare rock or paved terrains           |
|            |   |                |                                                                             | BDEG Scattered trees, low vegetation, bare rock or paved terrains and water   |
|            |   |                |                                                                             | BDF Scattered trees, low vegetation and bare soil or sand                     |
|            |   |                |                                                                             | BEF Scattered trees, bare rock or paved terrains and bare soil or sand        |
|            |   |                |                                                                             | CE Bushes/shrubs and bare rock or paved terrains                              |
|            |   |                |                                                                             | CF Bushes/shrubs and bare soil or sand                                        |
|            |   |                |                                                                             | D Low vegetation                                                              |
|            |   |                |                                                                             | DE Low vegetation and bare rock or paved terrains                             |
|            |   |                |                                                                             | DEF Low vegetation, bare rock or paved terrains and bare soil or sand         |
|            |   |                |                                                                             | DEFG Low vegetation, bare rock or paved terrains, bare soil or sand and water |
|            |   |                |                                                                             | DEG Low vegetation, bare rock or paved terrains and water                     |
|            |   |                |                                                                             | DF Low vegetation and bare soil or sand                                       |
|            |   |                |                                                                             | DG Low vegetation and water                                                   |
|            |   |                |                                                                             | E Bare rock or paved terrains                                                 |
|            |   |                |                                                                             | EG Bare rock or paved terrains and water                                      |
|            |   |                |                                                                             | F Bare soil or sand                                                           |
|            |   |                |                                                                             | G Water                                                                       |
| <b>J10</b> | 9 | Sparsely built | BDEG Scattered trees, low vegetation, bare rock or paved terrains and water |                                                                               |
|            |   |                | BDG Scattered trees, low vegetation and water                               |                                                                               |
|            |   | 11             | No buildings                                                                | BD Scattered trees and low vegetation                                         |
|            |   |                |                                                                             | BDEG Scattered trees, low vegetation, bare rock or paved terrains and water   |
|            |   |                |                                                                             | BDG Scattered trees, low vegetation and water                                 |
|            |   |                |                                                                             | BE Scattered trees and bare rock or paved terrains                            |
|            |   |                |                                                                             | BEG Scattered trees, bare rock or paved terrains and water                    |
|            |   |                |                                                                             | BG Scattered trees and water                                                  |
|            |   |                |                                                                             | CEG Bushes/shrubs and bare rock or paved terrains                             |
|            |   |                |                                                                             | DE Low vegetation and bare rock or paved terrains                             |
|            |   |                |                                                                             | DEG Low vegetation, bare rock or paved terrains and water                     |
|            |   |                |                                                                             | DG Low vegetation and water                                                   |
|            |   |                |                                                                             | EG Bare rock or paved terrains and water                                      |
|            |   |                |                                                                             | G Water                                                                       |

| Index    | Condition | % vegetation cover | Polygons (number) | Area (ha) |
|----------|-----------|--------------------|-------------------|-----------|
| J12B     | 3         | 55                 | 1                 | 11,21     |
| J12BDE   | 2         | 45                 | 71                | 819,00    |
| J12BE    | 3         | 55                 | 3                 | 21,68     |
| J13BD    | 4         | 55                 | 3                 | 93,13     |
| J13BDE   | 2         | 45                 | 269               | 3284,47   |
| J13BDEG  | 3         | 40                 | 1                 | 77,26     |
| J13CE    | 2         | 60                 | 1                 | 99,27     |
| J14B     | 3         | 60                 | 1                 | 86,34     |
| J14BD    | 3         | 55                 | 12                | 732,96    |
| J14BDE   | 3         | 55                 | 81                | 1967,92   |
| J14CD    | 3         | 60                 | 1                 | 90,42     |
| J14CDE   | 2         | 55                 | 3                 | 126,42    |
| J15B     | 3         | 60                 | 3                 | 80,34     |
| J15BC    | 3         | 60                 | 1                 | 98,63     |
| J15BCE   | 2         | 55                 | 1                 | 7,45      |
| J15BD    | 3         | 60                 | 7                 | 223,51    |
| J15BDE   | 3         | 55                 | 544               | 12794,87  |
| J15BE    | 2         | 35                 | 20                | 292,52    |
| J15DE    | 2         | 35                 | 19                | 47,85     |
| J16BD    | 3         | 65                 | 47                | 617,06    |
| J16BDE   | 2         | 35                 | 401               | 5547,18   |
| J16BDF   | 2         | 35                 | 1                 | 18,37     |
| J16BE    | 2         | 35                 | 7                 | 62,64     |
| J16CD    | 3         | 50                 | 5                 | 69,46     |
| J16D     | 3         | 55                 | 2                 | 0,80      |
| J16DE    | 2         | 35                 | 6                 | 4,02      |
| J17DE    | 2         | 35                 | 2                 | 28,83     |
| J18BDE   | 3         | 65                 | 17                | 183,75    |
| J18BDEG  | 3         | 65                 | 1                 | 4,92      |
| J18BE    | 3         | 70                 | 3                 | 91,65     |
| J18DE    | 3         | 50                 | 10                | 25,44     |
| J19BCD   | 4         | 75                 | 5                 | 6,29      |
| J19BD    | 4         | 65                 | 13                | 6,67      |
| J19BDE   | 3         | 75                 | 50                | 47,73     |
| J111BD   | 4         | 100                | 7                 | 17,67     |
| J111BDE  | 3         | 90                 | 9                 | 7,27      |
| J111BDEG | 4         | 90                 | 24                | 25,30     |
| J111D    | 4         | 100                | 5                 | 11,19     |
| J111DE   | 2         | 20                 | 4                 | 9,69      |
| J111DEG  | 3         | 80                 | 4                 | 38,95     |
| J111G    | 4         | 0                  | 19                | 16,25     |
| J25BDE   | 3         | 65                 | 19                | 286,39    |
| J25DE    | 3         | 55                 | 7                 | 63,21     |
| J25E     | 1         | 0                  | 2                 | 7,94      |
| J26ADE   | 4         | 70                 | 10                | 713,35    |
| J26BCE   | 3         | 60                 | 1                 | 16,08     |
| J26BD    | 4         | 75                 | 24                | 152,44    |
| J26BDE   | 4         | 55                 | 228               | 6816,01   |
| J26BE    | 3         | 55                 | 1                 | 7,15      |
| J26CDE   | 3         | 55                 | 2                 | 47,74     |
| J26CE    | 3         | 55                 | 4                 | 33,81     |
| J26DE    | 3         | 55                 | 19                | 123,80    |
| J26DF    | 2         | 55                 | 3                 | 12,23     |
| J28BDE   | 3         | 55                 | 5                 | 20,52     |
| J29BDE   | 4         | 80                 | 36                | 170,46    |
| J29DE    | 3         | 90                 | 13                | 9,25      |
| J211BD   | 4         | 95                 | 2                 | 6,08      |
| J32BDE   | 3         | 45                 | 4                 | 38,34     |
| J33BD    | 3         | 60                 | 11                | 42,76     |
| J33BDE   | 3         | 45                 | 202               | 3385,82   |
| J33BE    | 3         | 45                 | 2                 | 20,53     |
| J33DE    | 2         | 45                 | 9                 | 147,05    |
| J34BCD   | 4         | 75                 | 1                 | 215,52    |
| J34BDE   | 2         | 55                 | 10                | 19,66     |
| J35BD    | 3         | 80                 | 25                | 84,98     |
| J35BDE   | 3         | 55                 | 259               | 2796,56   |
| J35DE    | 2         | 55                 | 18                | 90,16     |
| J35EBD   | 2         | 35                 | 4                 | 30,05     |
| J36A     | 4         | 90                 | 11                | 7,54      |
| J36AD    | 3         | 85                 | 18                | 67,65     |
| J36ADE   | 3         | 65                 | 7                 | 84,99     |
| J36BCD   | 3         | 85                 | 444               | 2128,98   |
| J36BCDE  | 3         | 60                 | 17                | 159,95    |
| J36BCDG  | 4         | 65                 | 10                | 84,50     |
| J36BD    | 3         | 85                 | 3307              | 22335,06  |
| J36BDE   | 3         | 60                 | 13861             | 233386,29 |
| J36BDEG  | 3         | 55                 | 55                | 1456,11   |
| J36BDF   | 3         | 60                 | 1                 | 37,64     |

|         |   |     |      |          |
|---------|---|-----|------|----------|
| J36CD   | 2 | 80  | 10   | 6,26     |
| J36D    | 3 | 65  | 6    | 4,82     |
| J36DE   | 2 | 55  | 31   | 198,14   |
| J36EBD  | 2 | 35  | 9    | 216,97   |
| J37BCD  | 3 | 70  | 2    | 15,25    |
| J37BD   | 3 | 70  | 8    | 599,68   |
| J38BCD  | 4 | 80  | 3    | 31,02    |
| J38BD   | 3 | 80  | 17   | 670,88   |
| J38BDE  | 3 | 70  | 62   | 1431,81  |
| J38BDEG | 4 | 55  | 2    | 109,83   |
| J38DE   | 2 | 50  | 15   | 40,92    |
| J39A    | 5 | 95  | 159  | 158,13   |
| J39AB   | 5 | 90  | 10   | 9,38     |
| J39ACD  | 4 | 95  | 19   | 1529,59  |
| J39AD   | 4 | 90  | 191  | 720,58   |
| J39ADE  | 4 | 80  | 19   | 202,86   |
| J39AE   | 4 | 55  | 3    | 41,33    |
| J39BC   | 4 | 90  | 2    | 16,35    |
| J39BCD  | 4 | 95  | 1285 | 5279,22  |
| J39BCDG | 4 | 55  | 7    | 57,72    |
| J39BD   | 4 | 90  | 3951 | 9513,28  |
| J39BDE  | 3 | 80  | 3693 | 23276,43 |
| J39BDEG | 4 | 75  | 10   | 29,50    |
| J39BDF  | 3 | 80  | 5    | 22,76    |
| J39CD   | 3 | 90  | 30   | 26,53    |
| J39CDE  | 3 | 80  | 17   | 33,25    |
| J39D    | 3 | 90  | 97   | 45,74    |
| J39DC   | 3 | 90  | 6    | 3,11     |
| J39DE   | 2 | 80  | 160  | 329,58   |
| J311ACD | 4 | 90  | 1    | 6,17     |
| J311AD  | 5 | 100 | 14   | 134,47   |
| J311BCD | 4 | 100 | 16   | 17,98    |
| J311BD  | 4 | 100 | 109  | 145,68   |
| J311BDE | 3 | 15  | 13   | 17,51    |
| J311BDF | 3 | 10  | 6    | 11,29    |
| J311D   | 4 | 100 | 30   | 43,91    |
| J311DE  | 2 | 10  | 21   | 49,50    |
| J311DG  | 4 | 10  | 2    | 22,65    |
| J311E   | 2 | 0   | 9    | 6,80     |
| J45BCD  | 3 | 65  | 6    | 19,89    |
| J45BDE  | 2 | 55  | 148  | 1479,98  |
| J45BDEF | 2 | 55  | 7    | 260,79   |
| J45D    | 2 | 65  | 4    | 17,44    |
| J45DE   | 2 | 55  | 71   | 201,70   |
| J45DEF  | 2 | 50  | 3    | 78,95    |
| J45E    | 1 | 0   | 5    | 16,60    |
| J46A    | 5 | 75  | 4    | 26,68    |
| J46AE   | 4 | 65  | 1    | 99,70    |
| J46BDE  | 3 | 65  | 67   | 224,85   |
| J46BDEF | 2 | 65  | 2    | 27,23    |
| J46DE   | 3 | 65  | 18   | 34,19    |
| J49A    | 5 | 90  | 7    | 33,90    |
| J49AB   | 4 | 90  | 1    | 5,26     |
| J49AD   | 4 | 90  | 4    | 18,89    |
| J49ADE  | 3 | 75  | 1    | 29,59    |
| J49AE   | 4 | 75  | 3    | 20,29    |
| J49BDE  | 3 | 80  | 75   | 520,92   |
| J49BDEG | 4 | 80  | 7    | 47,14    |
| J49DE   | 3 | 80  | 18   | 41,50    |
| J49F    | 1 | 0   | 3    | 12,77    |
| J411F   | 2 | 0   | 5    | 58,43    |
| J55BDE  | 3 | 55  | 9    | 14,58    |
| J56BCD  | 3 | 65  | 5    | 9,34     |
| J56BD   | 3 | 65  | 5    | 7,85     |
| J56BDE  | 3 | 60  | 12   | 144,50   |
| J56EBD  | 2 | 45  | 1    | 7,26     |
| J59A    | 4 | 90  | 8    | 22,19    |
| J59AD   | 5 | 95  | 15   | 54,98    |
| J59ADE  | 4 | 95  | 5    | 250,09   |
| J59BCD  | 3 | 95  | 89   | 241,94   |
| J59BD   | 5 | 95  | 268  | 597,94   |
| J59BDE  | 4 | 85  | 908  | 4083,57  |
| J59BDEG | 5 | 90  | 8    | 140,58   |
| J59BDF  | 4 | 90  | 25   | 104,19   |
| J59CD   | 4 | 95  | 18   | 82,16    |
| J59CDE  | 3 | 90  | 4    | 12,65    |
| J59D    | 3 | 95  | 43   | 82,97    |
| J59DE   | 3 | 95  | 178  | 465,48   |
| J59DEF  | 3 | 50  | 1    | 10,74    |
| J59EBD  | 3 | 45  | 44   | 160,91   |
| J511A   | 5 | 100 | 363  | 664,08   |

|          |   |     |      |          |
|----------|---|-----|------|----------|
| J511ABD  | 5 | 100 | 2    | 84,69    |
| J511AC   | 5 | 100 | 3    | 5,32     |
| J511ACD  | 5 | 100 | 66   | 892,51   |
| J511ACE  | 4 | 90  | 2    | 130,01   |
| J511AD   | 5 | 100 | 596  | 3420,76  |
| J511ADE  | 5 | 95  | 27   | 603,47   |
| J511AE   | 5 | 90  | 42   | 310,36   |
| J511AFG  | 5 | 90  | 1    | 21,24    |
| J511B    | 5 | 100 | 23   | 24,03    |
| J511BC   | 4 | 100 | 50   | 87,63    |
| J511BCD  | 4 | 100 | 544  | 1543,77  |
| J511BCDE | 4 | 90  | 6    | 8,30     |
| J511BCDG | 5 | 75  | 5    | 7,99     |
| J511BCE  | 4 | 90  | 2    | 28,31    |
| J511BCF  | 4 | 85  | 1    | 26,88    |
| J511BD   | 4 | 100 | 5530 | 12706,89 |
| J511BDE  | 3 | 90  | 4037 | 11152,94 |
| J511BDEG | 4 | 90  | 24   | 141,66   |
| J511BDF  | 3 | 90  | 78   | 321,41   |
| J511BDG  | 5 | 90  | 19   | 82,54    |
| J511BE   | 4 | 90  | 98   | 217,91   |
| J511BFG  | 4 | 85  | 1    | 16,08    |
| J511C    | 3 | 100 | 13   | 19,97    |
| J511CD   | 4 | 100 | 234  | 1398,30  |
| J511CDE  | 3 | 80  | 127  | 395,67   |
| J511CDEF | 3 | 75  | 1    | 258,05   |
| J511CG   | 4 | 80  | 8    | 9,04     |
| J511D    | 4 | 100 | 2245 | 5345,39  |
| J511DE   | 3 | 90  | 1057 | 2742,60  |
| J511DEF  | 3 | 70  | 35   | 140,53   |
| J511DEG  | 4 | 70  | 3    | 9,36     |
| J511DF   | 3 | 80  | 23   | 355,06   |
| J511DFG  | 3 | 30  | 2    | 62,76    |
| J511E    | 2 | 0   | 18   | 15,11    |
| J511EBD  | 3 | 45  | 104  | 271,53   |
| J511ED   | 3 | 45  | 9    | 63,80    |
| J511F    | 2 | 0   | 14   | 33,13    |
| J64BDE   | 2 | 55  | 3    | 11,93    |
| J65BDE   | 2 | 55  | 31   | 41,04    |
| J66BCD   | 2 | 55  | 15   | 30,45    |
| J66BD    | 2 | 70  | 1    | 28,13    |
| J66BDE   | 2 | 55  | 29   | 235,80   |
| J66DE    | 2 | 55  | 18   | 18,42    |
| J68ABE   | 3 | 65  | 4    | 14,84    |
| J68ACD   | 4 | 55  | 1    | 5,74     |
| J68ACE   | 3 | 60  | 3    | 15,14    |
| J68AD    | 4 | 80  | 7    | 91,73    |
| J68ADE   | 4 | 60  | 6    | 81,08    |
| J68AE    | 4 | 60  | 20   | 112,22   |
| J68B     | 4 | 65  | 11   | 66,51    |
| J68BC    | 3 | 80  | 6    | 39,68    |
| J68BCD   | 4 | 80  | 91   | 314,56   |
| J68BCE   | 4 | 55  | 15   | 240,59   |
| J68BCF   | 3 | 55  | 1    | 11,03    |
| J68BD    | 4 | 90  | 439  | 1206,70  |
| J68BDE   | 3 | 55  | 5264 | 39801,85 |
| J68BDEF  | 2 | 55  | 20   | 261,51   |
| J68BDEG  | 4 | 55  | 39   | 474,22   |
| J68BDF   | 3 | 55  | 5    | 17,30    |
| J68BE    | 2 | 55  | 144  | 547,69   |
| J68BEF   | 2 | 60  | 10   | 421,13   |
| J68BFG   | 3 | 55  | 1    | 59,38    |
| J68C     | 3 | 80  | 7    | 330,90   |
| J68CD    | 3 | 80  | 56   | 709,61   |
| J68CDE   | 2 | 60  | 105  | 1518,45  |
| J68CDF   | 3 | 55  | 3    | 21,71    |
| J68CE    | 2 | 55  | 75   | 1331,70  |
| J68D     | 3 | 85  | 314  | 924,43   |
| J68DE    | 3 | 50  | 3238 | 13722,85 |
| J68DEF   | 2 | 45  | 63   | 595,58   |
| J68DEG   | 4 | 45  | 9    | 51,69    |
| J68DF    | 2 | 55  | 62   | 98,94    |
| J68E     | 1 | 0   | 441  | 941,35   |
| J68EBD   | 2 | 15  | 61   | 322,14   |
| J68ED    | 2 | 15  | 88   | 709,96   |
| J68EF    | 2 | 15  | 31   | 193,35   |
| J68F     | 1 | 0   | 13   | 103,23   |
| J69A     | 4 | 90  | 6    | 8,66     |
| J69AD    | 3 | 90  | 4    | 21,54    |
| J69AE    | 3 | 75  | 7    | 4,21     |
| J69BCD   | 4 | 80  | 66   | 113,98   |



|          |   |     |      |          |
|----------|---|-----|------|----------|
| J69BCDE  | 3 | 80  | 4    | 22,58    |
| J69BD    | 4 | 80  | 478  | 693,48   |
| J69BDE   | 4 | 80  | 920  | 2606,48  |
| J69BDEG  | 4 | 70  | 16   | 120,14   |
| J69BDF   | 3 | 50  | 11   | 25,07    |
| J69CD    | 4 | 80  | 15   | 10,32    |
| J69CDE   | 3 | 75  | 16   | 17,66    |
| J69D     | 3 | 90  | 308  | 459,63   |
| J69DE    | 2 | 80  | 656  | 1311,29  |
| J69DEF   | 2 | 35  | 10   | 21,32    |
| J69DEG   | 3 | 70  | 4    | 19,00    |
| J69DF    | 2 | 35  | 16   | 13,85    |
| J69E     | 1 | 0   | 17   | 10,15    |
| J610BCE  | 2 | 25  | 1    | 51,94    |
| J610BDE  | 2 | 35  | 246  | 6894,74  |
| J610BDEF | 2 | 35  | 2    | 11,67    |
| J610BDEG | 2 | 35  | 3    | 110,75   |
| J610BDF  | 2 | 45  | 5    | 24,59    |
| J610BE   | 2 | 35  | 20   | 325,67   |
| J610CDE  | 2 | 45  | 3    | 27,97    |
| J610CE   | 2 | 35  | 5    | 30,68    |
| J610CED  | 1 | 35  | 1    | 5,51     |
| J610DE   | 2 | 35  | 128  | 1677,21  |
| J610DEF  | 1 | 35  | 2    | 22,83    |
| J610DEG  | 2 | 40  | 1    | 377,57   |
| J610E    | 1 | 0   | 5    | 22,77    |
| J610EBD  | 2 | 15  | 18   | 397,22   |
| J611A    | 4 | 100 | 2    | 6,92     |
| J611AD   | 4 | 100 | 3    | 303,58   |
| J611BC   | 4 | 100 | 3    | 27,79    |
| J611BCD  | 4 | 100 | 5    | 6,03     |
| J611BCE  | 3 | 90  | 1    | 94,05    |
| J611BD   | 4 | 100 | 69   | 215,05   |
| J611BDE  | 4 | 90  | 37   | 200,40   |
| J611BDEF | 3 | 90  | 1    | 19,47    |
| J611BDEG | 4 | 35  | 2    | 27,30    |
| J611CD   | 3 | 100 | 1    | 43,21    |
| J611CDE  | 3 | 90  | 7    | 33,12    |
| J611D    | 3 | 100 | 41   | 160,13   |
| J611DE   | 3 | 90  | 60   | 221,22   |
| J611DEF  | 3 | 90  | 10   | 155,85   |
| J611DEG  | 4 | 90  | 7    | 24,35    |
| J611E    | 1 | 0   | 7    | 5,78     |
| J611ED   | 2 | 50  | 5    | 24,68    |
| J611F    | 1 | 0   | 2    | 7,89     |
| J78BDE   | 3 | 20  | 7    | 34,92    |
| J78DE    | 2 | 20  | 12   | 174,11   |
| J79BDE   | 3 | 15  | 15   | 341,84   |
| J79DE    | 2 | 15  | 25   | 124,91   |
| J79E     | 1 | 0   | 3    | 5,09     |
| J711BDE  | 2 | 15  | 351  | 2007,24  |
| J711BDEG | 3 | 15  | 4    | 15,19    |
| J711BE   | 2 | 10  | 180  | 439,28   |
| J711D    | 2 | 10  | 5    | 17,94    |
| J711DE   | 2 | 10  | 541  | 3029,21  |
| J711DEF  | 2 | 40  | 1    | 324,05   |
| J711DEG  | 2 | 50  | 1    | 5,55     |
| J711E    | 1 | 0   | 7366 | 16029,30 |
| J88BDE   | 2 | 30  | 4    | 33,23    |
| J88BDEFG | 3 | 30  | 3    | 242,27   |
| J88CF    | 1 | 10  | 1    | 144,19   |
| J88DEF   | 2 | 20  | 6    | 79,22    |
| J89BDE   | 2 | 30  | 8    | 298,16   |
| J89BDF   | 2 | 40  | 8    | 64,38    |
| J89DE    | 2 | 30  | 2    | 139,24   |
| J89DEF   | 2 | 30  | 1    | 36,77    |
| J89DF    | 2 | 40  | 6    | 17,45    |
| J811AEF  | 2 | 20  | 1    | 28,33    |
| J811BDE  | 3 | 35  | 29   | 287,57   |
| J811BDEG | 2 | 35  | 8    | 165,53   |
| J811BDF  | 2 | 40  | 14   | 202,62   |
| J811CF   | 2 | 35  | 9    | 1533,11  |
| J811DE   | 2 | 35  | 26   | 261,07   |
| J811DEF  | 2 | 35  | 72   | 1784,69  |
| J811DEFG | 2 | 35  | 4    | 143,01   |
| J811DEG  | 2 | 35  | 5    | 515,87   |
| J811DF   | 3 | 25  | 49   | 12089,57 |
| J811DFG  | 2 | 25  | 5    | 52,01    |
| J811E    | 1 | 0   | 10   | 174,11   |
| J811EF   | 1 | 0   | 1    | 6,79     |
| J811EG   | 2 | 0   | 5    | 1141,22  |

|           |   |     |     |        |
|-----------|---|-----|-----|--------|
| J811F     | 2 | 0   | 22  | 549,75 |
| J811FG    | 1 | 0   | 5   | 136,91 |
| J99BDE    | 2 | 35  | 1   | 1,81   |
| J99BDF    | 3 | 30  | 1   | 14,63  |
| J99DE     | 2 | 35  | 1   | 1,48   |
| J99DEF    | 2 | 15  | 2   | 29,59  |
| J99DF     | 2 | 30  | 3   | 8,37   |
| J99DFG    | 2 | 15  | 2   | 49,16  |
| J911ACD   | 3 | 100 | 1   | 106,55 |
| J911BCF   | 1 | 10  | 2   | 6,51   |
| J911BCG   | 2 | 30  | 1   | 46,27  |
| J911BD    | 1 | 15  | 1   | 0,73   |
| J911BDE   | 2 | 20  | 6   | 109,11 |
| J911BDEG  | 2 | 20  | 4   | 13,03  |
| J911BDF   | 2 | 20  | 8   | 37,34  |
| J911BEF   | 1 | 15  | 2   | 16,00  |
| J911CE    | 1 | 15  | 2   | 4,67   |
| J911CF    | 1 | 10  | 11  | 41,04  |
| J911D     | 2 | 30  | 109 | 587,20 |
| J911DE    | 2 | 20  | 18  | 86,37  |
| J911DEF   | 2 | 15  | 28  | 398,86 |
| J911DEFG  | 2 | 15  | 1   | 2,18   |
| J911DEG   | 2 | 20  | 4   | 52,71  |
| J911DF    | 2 | 30  | 14  | 197,96 |
| J911DG    | 2 | 10  | 1   | 2,02   |
| J911E     | 1 | 0   | 6   | 73,17  |
| J911EG    | 1 | 0   | 1   | 126,71 |
| J911F     | 1 | 0   | 16  | 93,50  |
| J911G     | 1 | 0   | 1   | 56,25  |
| J109BDEG  | 3 | 80  | 8   | 13,21  |
| J109BDG   | 3 | 30  | 1   | 6,30   |
| J1011BD   | 4 | 100 | 9   | 13,98  |
| J1011BDEG | 4 | 90  | 122 | 195,52 |
| J1011BDG  | 5 | 95  | 68  | 114,97 |
| J1011BE   | 3 | 80  | 10  | 53,67  |
| J1011BEG  | 4 | 80  | 34  | 114,83 |
| J1011BG   | 4 | 90  | 11  | 9,40   |
| J1011CEG  | 3 | 50  | 27  | 60,01  |
| J1011DE   | 3 | 80  | 3   | 5,89   |
| J1011DEG  | 3 | 80  | 53  | 160,51 |
| J1011DG   | 4 | 10  | 28  | 61,23  |
| J1011EG   | 3 | 0   | 33  | 61,88  |
| J1011G    | 4 | 0   | 44  | 328,31 |

71425 530170
